S5 Table.

| Sample number | <i>Order</i>             |                                       | <i>Family</i>            |                                       |
|---------------|--------------------------|---------------------------------------|--------------------------|---------------------------------------|
|               | ITS2F/ITS <sub>p</sub> 4 | ITS <sub>p</sub> 3/ITS <sub>u</sub> 4 | ITS2F/ITS <sub>p</sub> 4 | ITS <sub>p</sub> 3/ITS <sub>u</sub> 4 |
| 1             | 78                       | 52                                    | 78                       | 38                                    |
| 2             | 17                       | 17                                    | 0                        | 11                                    |
| 3             | 8                        | 11                                    | 30                       | 6                                     |
| 4             | 3                        | 1                                     | 78                       | 1                                     |
| 5             | 1                        | 2                                     | 1                        | 1                                     |
| 6             | 9                        | 13                                    | 12                       | 6                                     |
| 7             | 7                        | 5                                     | 5                        | 3                                     |
| 8             | 7                        | 10                                    | 1                        | 7                                     |
| 9             | 20                       | 47                                    | 9                        | 31                                    |
| 10            | 0                        | 6                                     | 17                       | 3                                     |
| 11            | 33                       | 50                                    | 8                        | 28                                    |
| 12            | 78                       | 1                                     | 3                        | 0                                     |
| 13            | 1                        | 2                                     | 1                        | 2                                     |
| 14            | 15                       | 15                                    | 6                        | 8                                     |
| 15            | 5                        | 3                                     | 7                        | 2                                     |
| 16            | 1                        | 1                                     | 7                        | 0                                     |
| 17            | 10                       | 12                                    | 20                       | 8                                     |
